RESEARCH ARTICLE

# Reward network mechanism in anhedonia and depression

Xiaoxiao Sun<sup>1</sup>✉, Chenxuan Jin<sup>1,2</sup>✉, Chun Cui<sup>3</sup>, Zhaohua Chen<sup>1</sup>, Qin Dai<sup>1,4</sup>✉

**1** Department of pain, the Southwest hospital, Army Medical University, Chong qing, China, **2** Joint Logistics Support Force Hospital 958, People's Liberation Army, China **3** Radiological Department, the Xinqiao Hospital of the Army Medical University, Chong Qing, China, **4** College of General Education and International, Chongqing Polytechnic University of Electronic Technology, Chong qing, China

✉ The authors contributed equally to this work.

\* [daiqin101@hotmail.com](mailto:daiqin101@hotmail.com)

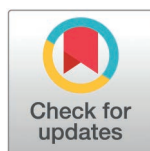

## Abstract

### Background

Depression is one of the most burdensome mental disorders. Anhedonia, a core symptom of major depressive disorder (MDD), is characterized by abnormal resting-state reward network (RN). However, it is unclear whether anhedonia symptom and depressive episode share similar resting-state RN mechanism, as well as whether the RN mechanism is a state or trait-like marker of depression. This study aims to clarify the two points by recruiting both current and remitted depression.

### Methods

Using functional Magnetic Resonance Imaging (fMRI) scans, this study observed the resting-state RN function connectivity (with the seed of ventral striatum) in patients with remitted depression (RMD,  $n = 27$ ) and current depression ( $n = 30$ ) and 33 normal controls. The low-frequency fluctuation (ALFF) and T1 image were further analyzed.

### Results

Three groups differed in anhedonia scores, with highest anhedonia in the MDD group and lowest anhedonia in the NC group. In total sample, higher anhedonia was correlated with weaker connectivity between the striatum seed and the putamen, inferior frontal cortex, insula, AC, and thalamus, while in the RMD group, anhedonia correlated with higher AC, thalamus, and caudate connectivity. In resting-state function connectivity, the MDD group possessed weaker connectivity between the striatum seed and inferior frontal cortex and insula, while the RMD group showed weaker connectivity with the caudate, and both the MDD and RMD groups possessed lower connectivity with the AC. ALFF data indicated a higher anterior cingulate (AC) activation

## OPEN ACCESS

**Citation:** Sun X, Jin C, Cui C, Chen Z, Dai Q (2025) Reward network mechanism in anhedonia and depression. PLoS One 20(9): e0332816. <https://doi.org/10.1371/journal.pone.0332816>

**Editor:** Rosemary Bassey, Donald and Barbara Zucker School of Medicine at Hofstra/Northwell, UNITED STATES OF AMERICA

**Received:** May 27, 2025

**Accepted:** September 4, 2025

**Published:** September 18, 2025

**Peer Review History:** PLOS recognizes the benefits of transparency in the peer review process; therefore, we enable the publication of all of the content of peer review and author responses alongside final, published articles. The editorial history of this article is available here: <https://doi.org/10.1371/journal.pone.0332816>

**Copyright:** © 2025 Sun et al. This is an open access article distributed under the terms of the [Creative Commons Attribution License](https://creativecommons.org/licenses/by/4.0/), which permits unrestricted use, distribution,

and reproduction in any medium, provided the original author and source are credited.

**Data availability statement:** The behavioral data that support the findings of this study were included in Supplementary materials. Due to reframing from military funding (2021HL003 and 2023yjsB02), the neural data could not be placed publicly and was available from the corresponding author upon reasonable request. To ensure the long term stability and availability of data, the neural data was packed and stored in three copies by a non-author institution (Military Psychology Committee institute, Chinese Society of Social Psychology) to ensure persistent or long-term data storage and availability, which was available from the official email address of this committee ([jslx-zwh@163.com](mailto:jslx-zwh@163.com)).

**Funding:** Doctor Dai claimed that this work was supported by Social Science Foundation of Chongqing (2023NDYB94), the Key project and innovation project of People's Liberation Army of China (2021HL003), and the education project of Army medical university (2023yjsB02). The funders had no role in study design, data collection and analysis, decision to publish, or preparation of the manuscript, only reframed the sharing of original neural data.

**Competing interests:** Authors claimed receiving research funding from Social Science Foundation of Chongqing (2023NDYB94), the Key project and innovation project of People's Liberation Army of China (2021HL003), and the education project of Army medical university (2023yjsB02). This does not alter our adherence to PLOS ONE policies on sharing behavioral data, only limits on original neural data sharing from military funding (2021HL003 and 2023yjsB02). Authors reported no biomedical financial interests or potential conflicts of interest. All authors stated that the content has not been published or submitted for publication elsewhere.

in the MDD group than the RMD group. T1 image indicated a bigger thalamus volume in the MDD group than the RMD group.

## Conclusions

The current study is among the first to confirm that RMD patients possess different RN pattern compared with MDD. Importantly, caudate plays a unique role in depression remission, ACC and thalamus mechanisms are trait-like markers of depression. Surprisingly, insula and inferior frontal mechanisms share by depressive episode and anhedonia, while putamen discriminates depressive episode and anhedonia. The results suggest candidate biomarkers for the treatment of clinical depression.

## Introduction

Depression is one of the most burdensome mental disorders [1], which has not been well prevented (3% to 22.5% incidence) [2] or cured (one-third non-responder and high recurrence: 60% after 5 years, 67% after 10 years, and 85% after 15 years) [3] despite decades of efforts. To better control depression, increasing studies have assessed the neural alterations of depression in an attempt to reveal potential cerebral mechanisms underlying the occurrence and recurrence of major depressive disorder (MDD) [4]. Neuro-imaging findings have identified that MDD patients showed decreased reward network (RN) connectivity (mainly in the prefrontal-striatal regions) [5,6], which comprised of ventral and dorsal striatum, medial prefrontal-cortex (including orbito-frontal cortex), anterior cingulate, medial temporal lobes, and ventral tegmental area [7]. Blunted left ventral striatum response to reward was associated with a lifetime depression diagnosis [8]. Recent review indicated that compared with healthy controls, patients with MDD exhibited common activity decreases in the right striatum (putamen, caudate) and subgenual ACC [9]. Functional connectivity between the ventral striatum (key region of the RN) and the default mode network was found to be positively and significantly associated with depression scores [10]. Moreover, RN connectivity was found to be correlated with antidepressant therapy in which changes in the sensitivity of the neural reward were positively correlated with the improvement of depressive symptoms [11]. Consistently, MDD patients who do not respond to repetitive transcranial magnetic stimulation therapy were found to show significantly weaker connectivity in the traditional reward network [12]. These results suggest a role of the neural RN in depressive episode.

A core symptom of major depressive disorder is anhedonia, which has been often defined as hyposensitivity to reward (this perspective focuses on emotional arousal to reward) [13], and also defined sometimes as diminished anticipation and pursuit of reward (this perspective focuses on motivation and behavior responses to reward) [14]. The cerebral foundation of anhedonia has been explored. In which, the hypo-arousal could be well observed in resting-state neural images [12, 15], while the motivation and behavior responses could be observed by money-reward task [16]. Specifically, it was found that anhedonia was correlated with non-response to

transcranial magnetic stimulation which had lower resting-state connectivity in the classical reward pathway [12]. Consistently, a disturbance in resting-state reward network has been confirmed to be correlated with depressive anhedonia in rats [15]. Change in anhedonia scores negatively correlated with rsFC after antidepressant treatment [17]. A previous study further reported that anhedonia symptom and depressive mood were associated with similar striatal circuits in MDD patients with money-reward task [16]. Indeed, RN was indicated associated with both anhedonia and depression [18]. The results indicated a role of RN, especially the ventral striatum, in anhedonia. However, anhedonia is a core symptom of depressive episode, anhedonia itself can not represent a depressive episode [19]. Specifically, to be diagnosed with MDD, one must be in depressed mood or anhedonia which causes social/occupational impairment [20], i.e., anhedonia is only one symptom of MDD which might be exempted from experiencing by some patients with MDD [19]. If some patients experience anhedonia while others not, it thus could be deduced that the neural mechanism underlying MDD may be differed but alike with anhedonia (**Hypothesis 1**), since that MDD was formed by broader symptoms such as sadness or insomnia which were very different from anhedonia [21,22]. However, further evidence is needed to confirm whether anhedonia symptom and depressive episode share similar but subtly-different resting-state reward network mechanism, clarifying this issue might be important to suggest candidate cortex for clinical depression therapy, especially for anhedonia-type depression.

Importantly, depression is a highly recurrent mood disorder [23]. Comparison between current and remitted depression may suggest trait- or state- marker of depression, i.e., commonality between them suggests a trait-like marker while difference between them suggests a state-like marker [24–26]. However, we do not know whether the RN mechanism is a state marker or a trait-like character closely correlated with the onset or recurrence of depression. Unfortunately, although a few studies observed neural differences between current and remitted depression [27], most studies explored the neural activation of current and remitted depression separately [5,12,28–30]. Among these studies, current depression was observed most often [5,12,30], while few studies focused on remitted depression [28]. A limited number of researches reported that remitted depression has a different RN activation during a reward process (hyperactivation while anticipating a reward in bilateral anterior cingulate gyrus and right midfrontal gyrus and hypoactivation during reward outcomes in orbital frontal cortex, right frontal pole, left insular cortex, and left thalamus) [28]. In contrast, in another study, hypoactivation in the putamen and caudate of a remitted patient was observed [29]. It is well known that the current and remitted depression differ in symptoms [31] and neural foundation [25,26], it could be assumed that they differ significantly in resting-state RN mechanism (**Hypothesis 2**). Therefore, this study included patients with remitted depression (RMD) to confirm the role of RN mechanism during the remission of depression, and further compare with that of MDD to confirm whether RN mechanism is a state marker of depressive episode or a trait-like mechanism related to the occurrence and recurrence of depression.

Thus, the present study had two aims. The first was to explore the differences in the RN mechanisms between anhedonia and depressive episode. The second was to explore the differences in the RN mechanism between current and remitted depression. Our hypotheses were as follows: (1) Anhedonia and depressive episode may share similar but subtly-different RN mechanism. (2) Current and remitted depression may share different RN mechanisms.

## Methods

### Participants

To compare the neural network connectivity in individuals with different depressive statuses, we recruited never depressed normal controls (NCs) and patients with remitted and current depression from April of 2021 to January of 2022. The depressed patients were recruited through the psychiatrists in clinic, and the healthy controls were recruited via an advertisement. The depressive symptoms were evaluated using the Beck Depression Inventory-II (BDI-II) [32,33], the Patient Health Questionnaire (PHQ-9) [34,35], the [Structured Clinical Interview for](#) Diagnostic and Statistical Manual for Mental Disorders-5<sup>th</sup> (SCID) [36] and the Hamilton Depression Rating Scale (HDRS, 24 items) [37]. To investigate the anxiety status of the

participants, the Beck Anxiety Inventory-II (BAI) was also used. The inclusion criteria for the three groups were as follows: the normal controls should not have a lifetime or current psychosis or depression, the MDD patients should be diagnosed as having major depression by a clinical psychiatrist and have had two or more episodes according to the symptoms of the DSM-5<sup>th</sup> [38], and the RMD individuals should be antidepressant free for 3 months or longer and recovered from their last episode for 6 months or longer (the mean remission time was 9.24 months). The exclusion criteria were as follows: current or history of any psychopathology and/or drug and alcohol abuse/infection, drug dependence, allergies within the last half month, physical trauma, severe physical disease, learning or cognitive disability. Due to the potential risk from a fMRI scan, subjects with the following situations were also excluded: being pregnant or having a pacemaker, any magnetic or metal materials within the whole body, or having epilepsy or a history of brain surgery. The recruitment details were shown in our previous work and in [S1 Fig](#) [39]. Thirty MDD patients, twenty-seven remitted individuals, and thirty-three normal controls were recruited. All MDD patients took medicine (eight were taking fluoxetine hydrochloride, 20–40 mg; ten were taking mirtazapine, 30–40 mg; and twelve were taking paroxetine hydrochloride, 20–30 mg). See [S1 Fig](#) for the details.

## Questionnaire

The PHQ-9 and BDI-II were utilized to evaluate the levels of depression. The PHQ-9 assessed the symptoms of depression corresponding to the frequency of 9 diagnostic items of major depression, and the BDI-II examined the severity of depression with 21 items [32,40]. The first item (frequency: loss of interest and pleasure) of PHQ and the fourth item (severity: loss of pleasure) of BDI-II were further used to evaluate the anhedonia symptoms of subjects. The BAI also examined the level of anxiety with 21 items [40].

## Procedures

All procedures performed in studies involving human participants were in accordance with the ethical standards of the institutional and/or national research committee and with the 1964 Helsinki Declaration and its later amendments or comparable ethical standards. The study protocol including participants' capacity to provide consent in accordance with the Declaration of Helsinki was approved by the Ethics Committee of Human Research of the Army Medical University (2020-036-02) and Chinese Clinical Trial registry center (ChiCTR2100044258). The clinical patients with MDD were screened and recruited by the psychiatrists in clinic based on the SCID and the HDRS. The potential subjects (patients and normal controls) were screened for recruitment and their capacity to provide consent by trained personnel with doctoral degree who major in psychology via telephone, and qualified participants were scheduled for appointments after the interview via telephone. After the subjects arrived, they were orally informed about the detailed procedure of this study and were further informed about their right to quit any time during the study without any negative outcome. After the subjects signed on the written informed consent forms, a 10-minute rest period was allowed before the formal study to help subjects to become familiar with the study environment. After the study, participants were available with free psychological consultation and gifted (50 Yuan for each participant).

## MRI image acquisition

The brain images were obtained from a whole-body MRI system (Germany, Erlangen, 3.0-T Siemens TimTrio) with a 12-channel phased-array head coil, located at Southwest Hospital of Chongqing, China. The image data were scanned via single shot T2-weighted EPI (echo planar imaging, TR/TE = 2000/30 ms, reconstruction matrix =  $64 \times 64$ , flip angle =  $90^\circ$ , FOV = 384 mm, voxel size =  $3.0 \times 3.0 \times 3.0 \text{ mm}^3$ , 4 mm slice thickness with 1 mm gap, and number of slices for each volume = 36). The duration of the scan for the resting state was 8 minutes (240 volumes). The anatomical images were obtained via the 3D-T1 MPAGE protocol (TI/TR/TE = 900/2530/2.34 ms, reconstruction matrix =  $256 \times 256$ , flip angle =  $7^\circ$ , slice thickness = 1 mm, FOV = 256 mm, and number of slices = 192).

## MRI image analyses

The cerebral activation images were processed using SPM8.

**Preprocessing** The first 10 scan images were removed. Then, the remaining images were preprocessed via SPM8. The brief procedures included the following: (1) slice timing, (2) realignment, (3) coregistration, (4) segmentation, (5) normalization (via DARTEL with a re-sampling rate of  $3 \times 3 \times 3 \text{ mm}^3$  ( $1 \times 1 \times 1 \text{ mm}^3$  for anatomic images)), and (6) smoothing (size of kernel smoothing = 6 mm (FWHM)). The head motion, cerebrospinal fluid, and white matter were regressed out during the preprocessing with DPARSFA [41].

## Resting-state data

REST 1.8 was used to analyze the amplitude of low-frequency fluctuation (ALFF) of resting state [41]. In general, linear regression was conducted on data after preprocessing to remove linear tendency. Hamming band-pass filter was then carried out to remain the signals between 0.01 and 0.08 Hz (low-frequency). The ALFF value of whole-brain voxel was computed, which was used to divide the average ALFF, and resulted in a standard ALFF value [42].

The functional connectivity between cerebral cortexes was analyzed using REST 1.8 (Resting-State fMRI Data Analysis Toolkit) [43], and automated anatomical labeling (AAL) was used [44]. The MNI coordinates of the ventral striatum (21, 9, 0) were consistent with the literature [45]. RN connectivity was obtained from the whole-brain functional connectivity with this ventral striatum seed. See the supplementary materials (S2 Fig) for details.

## T1 image

T1 image was analyzed with SPM8 via DARTEL (voxel-based morphometry, VBM) [44]. The brief procedures included the following: (1) segmentation; (2) normalization; (3) nonlinear registration; (4) coregistration; (5) smoothing. One-way ANOVA was conducted on T1 image data between the three groups.

## Statistics

One-way ANOVA was conducted on T1 and ALFF image data and the functional connectivity between the three groups. A subsequent independent t-test was conducted in each of the two group comparisons (AlphaSim correction, corrected  $p$  value < .01 (uncorrected  $p$  value < .001), in a brain volume of  $61 \times 73 \times 61$ , estimated spatial smoothness of 6 mm, and a minimum cluster size of 26 voxels or  $702 \text{ mm}^3$  (AFNI; <https://afni.nimh.nih.gov/pub/dist/doc/manual/AlphaSim.pdf>), RN mask (S2 Fig)). Moreover, a correlation analysis was also conducted between the value of resting-state RN connectivity and anhedonia scores using REST 1.8 [43]. The analyzed images were configured using Rest Viewer (overlaid above a  $\text{ch2}$  bet.nii template). Age and gender were controlled as covariables.

The demographic information and scores of scales of the participants were compared via one-way ANOVA, while the ratio of gender and anhedonia were evaluated by  $\chi^2$  test.

## Results

### General information (Table 1)

Three groups did not significantly differ in age ( $F(2,87) = 0.038$ , partial  $\eta^2 = 0.001$ ,  $p = 0.962$ ), education level ( $F(2,87) = 0.112$ , partial  $\eta^2 = 0.003$ ,  $p = 0.894$ ), or male/female ratio ( $\chi^2 = 2.001$ ,  $p = 0.368$ ,  $df = 2$ ,  $N = 90$ ). As hypothesized, they significantly differed on the BDI-II ( $F(2,87) = 223.166$ , partial  $\eta^2 = 0.84$ ,  $p < 0.001$ ), PHQ ( $F(2,87) = 252.477$ , partial  $\eta^2 = 0.853$ ,  $p < 0.001$ ), HDRS ( $F(2,87) = 624.037$ , partial  $\eta^2 = 0.94$ ,  $p < 0.001$ ), and BAI scores ( $F(2,87) = 58.101$ , partial  $\eta^2 = 0.572$ ,  $p < 0.001$ ), with the lowest scores in the NC group and the highest scores in the MDD group. The remitted and current depression groups did not significantly differ in the duration of depression or the number of episodes ( $p > 0.05$ ). The three groups did not significantly differ in head motion ( $F(2,87) = 2.137$ , partial  $\eta^2 = 0.047$ ,  $p = 0.124$ ).



**Table 1. General information.**

|                             | Gender (M/F) | Age           | Education (years) | Episodes    | Duration of illness (years) | FD value of head motion | Score of PHQ | Score of BDI  | Score of HDRS | Score of BAI |
|-----------------------------|--------------|---------------|-------------------|-------------|-----------------------------|-------------------------|--------------|---------------|---------------|--------------|
| NC (n=33)                   | 11/22        | 48.85 ± 12.38 | 12.33 ± 2.33      |             |                             | 0.13 ± 0.05             | 1.12 ± 1.24  | 2.21 ± 1.45   | 1.92 ± 1.24   | 1.77 ± 1.36  |
| MDD (n=30)                  | 7/23         | 48.77 ± 11.88 | 12.47 ± 2.69      | 2.80 ± 1.35 | 9.20 ± 1.94                 | 0.12 ± 0.06             | 21.63 ± 5.25 | 34.23 ± 10.08 | 23.27 ± 2.95  | 12.97 ± 6.75 |
| RMD (n=27)                  | 11/16        | 49.56 ± 10.77 | 12.11 ± 3.52      | 2.63 ± 1.33 | 8.67 ± 2.66                 | 0.15 ± 0.06             | 5.41 ± 3.87  | 6.74 ± 4.59   | 5.67 ± 3.11   | 4.63 ± 2.63  |
| P (ANOVA/<br>$\chi^2$ test) | 0.368        | 0.962         | 0.894             | 0.634       | 0.387                       | 0.124                   | <0.001       | <0.001        | <0.001        | <0.001       |

Note: M = male. F = female. BAI = Beck Anxiety Inventory. BDI-II = Beck Depression Inventory-II. PHQ = patient health questionnaire. HDRS = the Hamilton Depression Rating Scale. NC = Never disordered healthy Controls. MDD = Major Depressive Disorder. RMD = Remitted depression.

<https://doi.org/10.1371/journal.pone.0332816.t001>

### Anhedonia symptoms of the participants (Table 2)

Due to the close relationship between anhedonia and depressive episode, ANOVA was conducted on the anhedonia items of the questionnaires to compare the anhedonia symptom between groups. The results confirmed the expected differences between three groups on the scores of anhedonia item (first item) of the PHQ ( $F(2,87) = 99.031$ ,  $p < 0.001$ , partial  $\eta^2 = 0.70$ ) and the fourth item of the BDI-II ( $F(2,87) = 106.399$ ,  $p < 0.001$ , partial  $\eta^2 = 0.71$ ), with the lowest scores in the normal controls and highest scores in the MDD group. Consistently, more individuals in the MDD group (all except one) reported suffering from anhedonia compared with the other two groups, based on the scores of first item of PHQ ( $\chi^2 = 42.106$ ,  $df = 2$ ,  $N = 90$ ,  $p < 0.001$ ) and fourth item of BDI-II ( $\chi^2 = 60.705$ ,  $df = 2$ ,  $N = 90$ ,  $p < 0.001$ ).

### Correlation between functional connectivity and anhedonia (Table 3)

To observe the relationship between neural function connectivity and depressive anhedonia, correlations between the value of resting-state RN connectivity and the anhedonia scores in all participants and sub-groups were conducted using REST 1.8. In total sample, a negative correlation was found between the severity of anhedonia (4<sup>th</sup> item of BDI-II, Fig 1) and striatum functional connectivity in the right putamen ( $r = -0.39$ ,  $k = 14$ ,  $p < 0.05$ ), left inferior frontal cortex ( $r = -0.31$ ,  $k = 21$ ,  $p < 0.05$ ), right inferior frontal cortex ( $r = -0.38$ ,  $k = 47$ ,  $p < 0.05$ ), left AC ( $r = -0.41$ ,  $k = 57$ ,  $p < 0.05$ ), and right insula ( $r = -0.43$ ,  $k = 43$ ,  $p < 0.01$ ); in addition, a negative correlation was found between the frequency of anhedonia (1<sup>st</sup> item of PHQ, Fig 2) and striatum functional connectivity in the right insula ( $r = -0.42$ ,  $k = 24$ ,  $p < 0.05$ ), left inferior frontal cortex ( $r = -0.33$ ,  $k = 21$ ,  $p < 0.05$ ), left putamen ( $r = -0.29$ ,  $k = 24$ ,  $p < 0.05$ ), and right thalamus ( $r = -0.34$ ,  $k = 27$ ,  $p < 0.05$ ). In the RMD group, a positive correlation was found between the severity of anhedonia (Fig 3) and striatum functional connectivity in the right thalamus ( $r = 0.78$ ,  $k = 50$ ,  $p < 0.05$ ); a negative correlation was found between the severity of anhedonia and striatum functional connectivity in the right caudate

**Table 2. Anhedonia symptom of participants.**

|            | Scores of anhedonia item |                     | Ratio of anhedonia (present/absent) |                     |
|------------|--------------------------|---------------------|-------------------------------------|---------------------|
|            | PHQ-1 <sup>st</sup>      | BDI-4 <sup>th</sup> | PHQ-1 <sup>st</sup>                 | BDI-4 <sup>th</sup> |
| NC (n=33)  | 0.15 ± 0.57              | 0.03 ± 0.17         | 5/28                                | 1/32                |
| MDD (n=30) | 2.57 ± 0.77              | 2.07 ± 0.83         | 29/1                                | 30/0                |
| RMD (n=27) | 0.67 ± 0.78              | 0.41 ± 0.57         | 13/14                               | 10/17               |
| $F/\chi^2$ | 99.031**                 | 106.399**           | 42.106**                            | 60.705**            |

Note: \*\*  $p < 0.01$ .

<https://doi.org/10.1371/journal.pone.0332816.t002>

**Table 3. Correlation between RN function connectivity and anhedonia.**

| Cortex                  | L/R | Cluster (k) | r       | MNI |     |    |
|-------------------------|-----|-------------|---------|-----|-----|----|
|                         |     |             |         | x   | y   | z  |
| BDI4-all subjects       |     |             |         |     |     |    |
| Putamen                 | R   | 14          | -0.37** | 15  | 6   | -6 |
| Inferior frontal cortex | L   | 21          | -0.30** | -39 | 24  | 6  |
| Inferior frontal cortex | R   | 47          | -0.29** | 54  | 24  | 3  |
| AC                      | L   | 57          | -0.36** | -12 | 36  | 0  |
| Insula                  | R   | 43          | -0.39** | 36  | 9   | 9  |
| PHQ1-all subjects       |     |             |         |     |     |    |
| Thalamus                | R   | 27          | -0.26*  | 9   | -9  | 3  |
| Putamen                 | L   | 24          | -0.22*  | -30 | 6   | -3 |
| Insula                  | R   | 24          | -0.35** | 36  | 9   | 12 |
| Inferior frontal cortex | L   | 21          | -0.30** | -39 | 18  | 9  |
| RMD- BDI4               |     |             |         |     |     |    |
| Caudate                 | R   | 12          | -0.57** | 6   | 9   | -3 |
| Thalamus                | R   | 50          | 0.52**  | 6   | -12 | 3  |
| Suprior Frontal Gyrus   | R   | 46          | -0.70** | 9   | 12  | 66 |
| RMD- PHQ1               |     |             |         |     |     |    |
| Caudate                 | R   | 38          | 0.53**  | 12  | 12  | 6  |
| AC                      | R   | 50          | 0.47*   | 3   | 33  | 21 |
| Thalamus                | R   | 23          | 0.55**  | 18  | -12 | 9  |

Note: L: left, R: right, \*  $p < 0.05$ , \*\*  $p < 0.01$ . MDD=Major Depressive Disorder. RMD=Remitted depression. BDI4=Anhedonia item of Beck depression inventory. PHQ1=Anhedonia item of patient health questionnaire.

<https://doi.org/10.1371/journal.pone.0332816.t003>

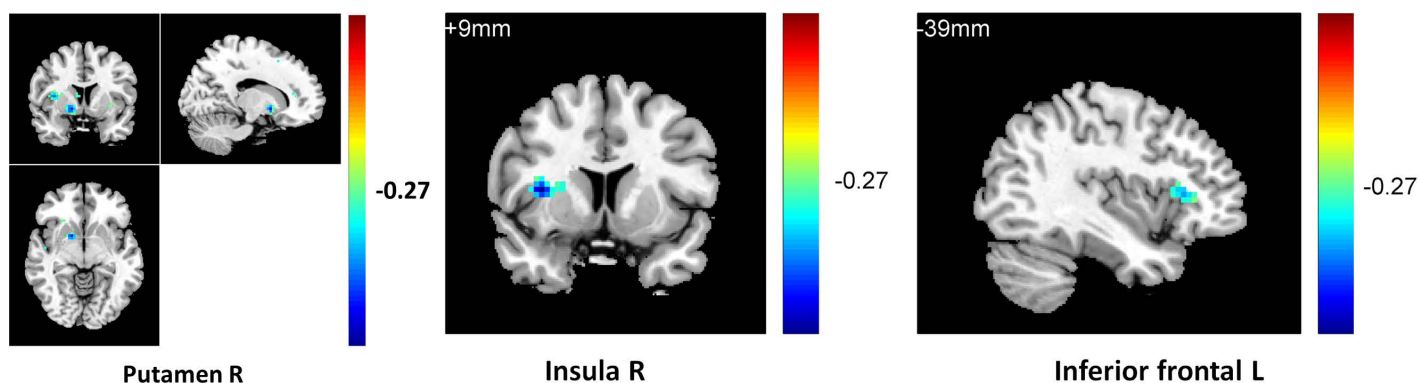

**Fig 1. Negative correlation between insula, inferior frontal, and putamen connectivity and depressive anhedonia (BDI4).**

<https://doi.org/10.1371/journal.pone.0332816.g001>

( $r = -0.65$ ,  $k = 12$ ,  $p < 0.05$ ) and right superior frontal gyrus( $r = -0.81$ ,  $k = 46$ ,  $p < 0.01$ ); and a positive correlation was found between the frequency of anhedonia (Fig 4) and striatum functional connectivity in the right caudate ( $r = 0.77$ ,  $k = 38$ ,  $p < 0.01$ ), right AC ( $r = 0.79$ ,  $k = 50$ ,  $p < 0.01$ ), and right thalamus ( $r = 0.77$ ,  $k = 23$ ,  $p < 0.01$ ). No significant correlation between anhedonia and striatum connectivity was found in the NC and MDD groups. See Figs 1–2, Table 3, and S3 Fig (scatterplots) for details.

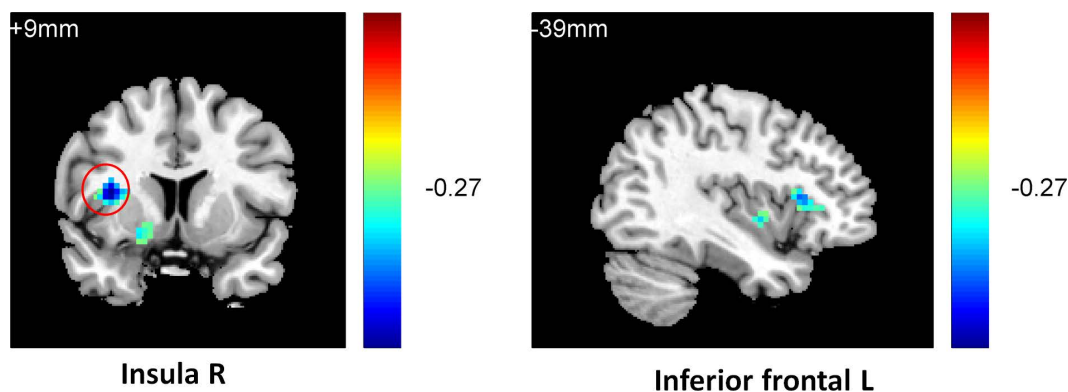

Fig 2. Negative correlation between insula, inferior frontal, and putamen connectivity and depressive anhedonia (PHQ1).

<https://doi.org/10.1371/journal.pone.0332816.g002>

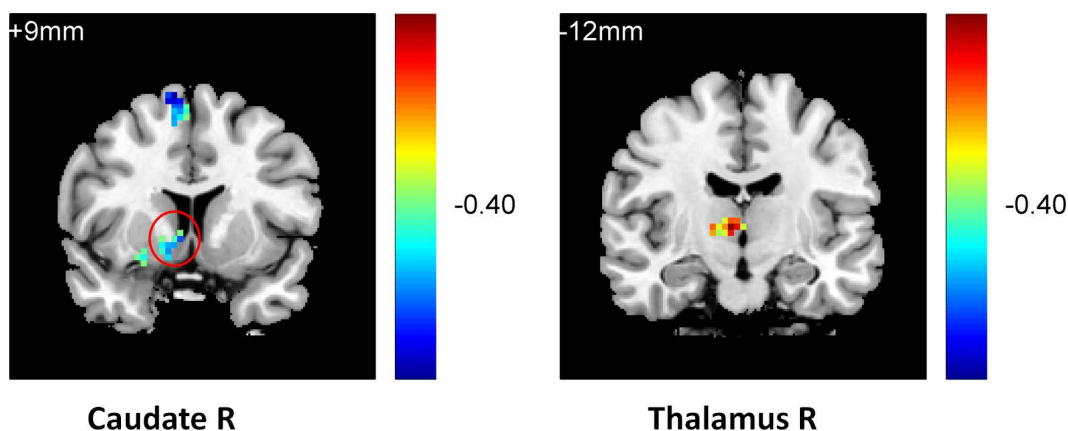

Fig 3. Negative correlation between caudate connectivity and positive correlation between thalamus and ACC connectivity and depressive anhedonia in RMD group (BDI4).

<https://doi.org/10.1371/journal.pone.0332816.g003>

## Resting-state activity and function connectivity in current and remitted depression

**Functional connectivity (Table 4).** One-way ANOVA (analyzed using REST 1.8) on the functional connectivity between the striatum seed and RN indicated that the three groups differed in their connectivity between the striatum seed and the left caudate ( $k=21$ ,  $p<0.01$ ), the left anterior ( $k=43$ ,  $p<0.05$ ), and the middle cingulate gyrus ( $k=24$ ,  $p<0.05$ ), [S4 Fig](#). Further two-sample t-tests (AlphaSim correction, corrected  $p$ -value  $<0.01$ ) indicated that compared with the normal controls, the patients with current depression exhibited weaker connectivity between the striatum seed and the right insula ( $k=27$ ,  $p<0.01$ ), the right inferior frontal cortex ( $k=130$ ,  $p<0.05$ ), and the left anterior cingulate gyrus (AC) ( $k=119$ ,  $p<0.05$ ) ([Fig 5](#)). In contrast, compared with the MDD group, individuals with remitted depression showed stronger connectivity between the striatum seed and the right inferior frontal cortex ( $k=55$ ,  $p<0.05$ ), the right insula ( $k=20$ ,  $p<0.05$ ), and the right middle frontal gyrus ( $k=43$ ,  $p<0.05$ ) and weaker connectivity between the striatum seed and the left and right caudate ( $k=27$ ,  $k=26$ ,  $p<0.05$ ) ([Fig 6](#)). They also showed weaker connectivity between the striatum seed and the left caudate ( $k=117$ ,  $p<0.01$ ) and the cingulate gyrus ( $k=76$ ,  $p<0.01$ ) compared with the normal controls ([Fig 7](#)).

**Amplitude of low-frequency fluctuation (ALFF).** An ANOVA was conducted on the ALFF data, which indicated a difference between three groups in the right ACC ( $k=13$ ,  $F(2,87)=7.04$ ,  $x=9$   $y=21$   $z=-9$ ,  $p<0.01$ ). A further two-sample t



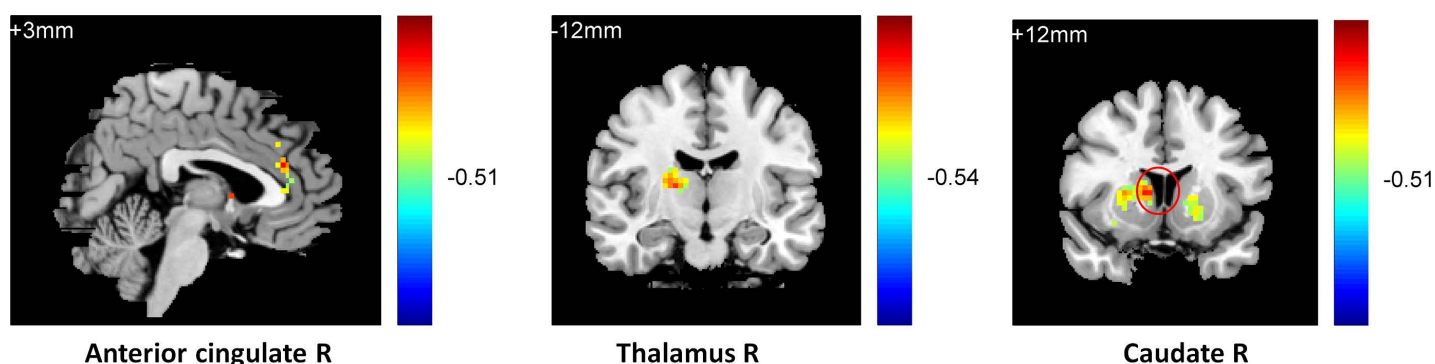

**Fig 4. Negative correlation between caudate connectivity and positive correlation between thalamus and ACC connectivity and depressive anhedonia in RMD group (PHQ1).**

<https://doi.org/10.1371/journal.pone.0332816.g004>

**Table 4. RN function connectivity in current and remitted depression (striatum seed).**

| Cortex                  | L/R | Cluster (k) |         | MNI |    |     |
|-------------------------|-----|-------------|---------|-----|----|-----|
| Three groups            |     |             | F       | x   | y  | z   |
| Caudate                 | L   | 11          | 14.89** | -18 | -3 | -21 |
| Anterior Cingulate      | L   | 43          | 6.45*   | -12 | 33 | 6   |
| Middle Cingulate        | L   | 14          | 15.39*  | -3  | -3 | 33  |
| MDD-NC                  |     |             | t       | x   | y  | z   |
| Insular                 | R   | 27          | -4.40** | 36  | 9  | 9   |
| Inferior frontal cortex | R   | 130         | -3.49*  | 54  | 21 | 24  |
| Anterior Cingulate      | L   | 119         | -4.61*  | -12 | 39 | 0   |
| RMD-MDD                 |     |             | t       | x   | y  | z   |
| Inferior frontal cortex | R   | 55          | 3.83*   | 57  | 21 | 15  |
| Caudate                 | R   | 26          | -3.78*  | 6   | -9 | 15  |
| Caudate                 | L   | 27          | -3.54*  | -18 | -3 | 21  |
| Insula                  | R   | 10          | 3.41*   | 21  | 12 | -9  |
| Middle Frontal Gyrus    | R   | 43          | 3.96*   | 36  | 33 | 30  |
| RMD-NC                  |     |             | t       | x   | y  | z   |
| Caudate                 | L   | 117         | -6.03** | -18 | -3 | 21  |
| Cingulate gyrus         | R/L | 76          | -5.17** | -3  | -3 | 33  |

Note: L: left, R: right, \*  $p < 0.05$ , \*\*  $p < 0.01$ .

<https://doi.org/10.1371/journal.pone.0332816.t004>

test (AlphaSim correction, corrected  $p$  value  $< .01$ ) showed that the RMD group had a lower activity in the right ACC ( $k = 17$ ,  $t = 3.09$ ,  $x = 9$ ,  $y = 21$ ,  $z = -6$ ,  $p < .01$ ) compared with the MDD group.

**T1 image.** An ANOVA was conducted on the T1 image, which indicated a difference between the three groups in the right thalamus ( $k = 40$ ,  $x = 9$ ,  $y = -24$ ,  $z = 15$ ,  $F(2, 87) = 7.19$ ,  $p < .01$ ). A further two-sample  $t$  test (AlphaSim correction, corrected  $p$  value  $< .01$ ) showed that the RMD group had a smaller volume in the right thalamus ( $k = 79$ ,  $x = 12$ ,  $y = -24$ ,  $z = 18$ ,  $t = 3.64$ ,  $p < .01$ ) compared with the MDD group. See [S5 Fig](#) for details.

## Discussions

The current study found that RMD patients possess different RN patterns of anhedonia. Potentially and importantly, the caudate played a unique role in depression remission, ACC and thalamus mechanisms were trait-like markers of depression.

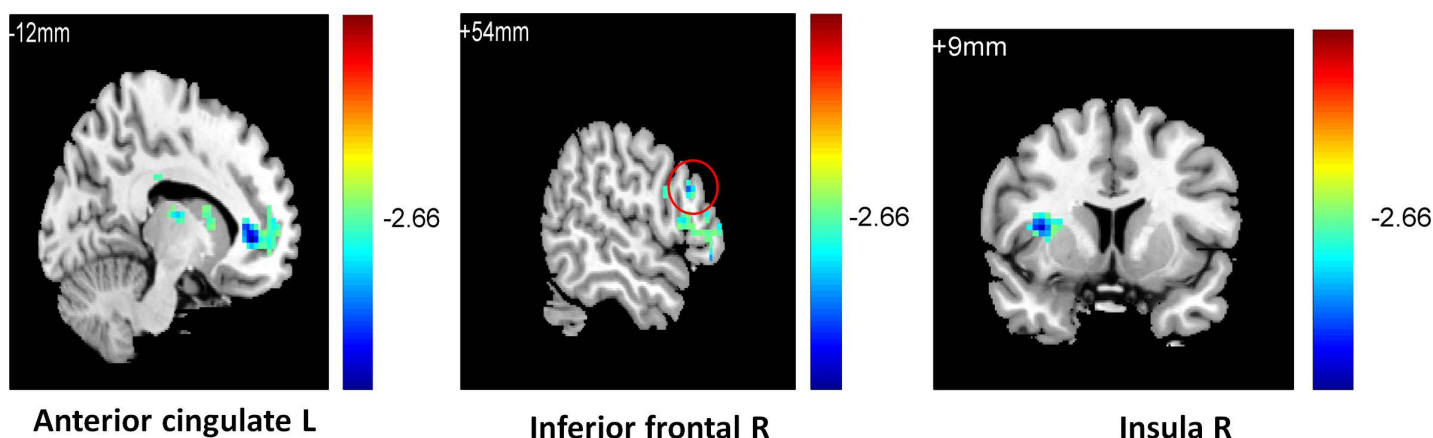

**Fig 5. Lower inferior frontal, anterior cingulated and insula connectivity in the MDD group compared with the NC group.**

<https://doi.org/10.1371/journal.pone.0332816.g005>

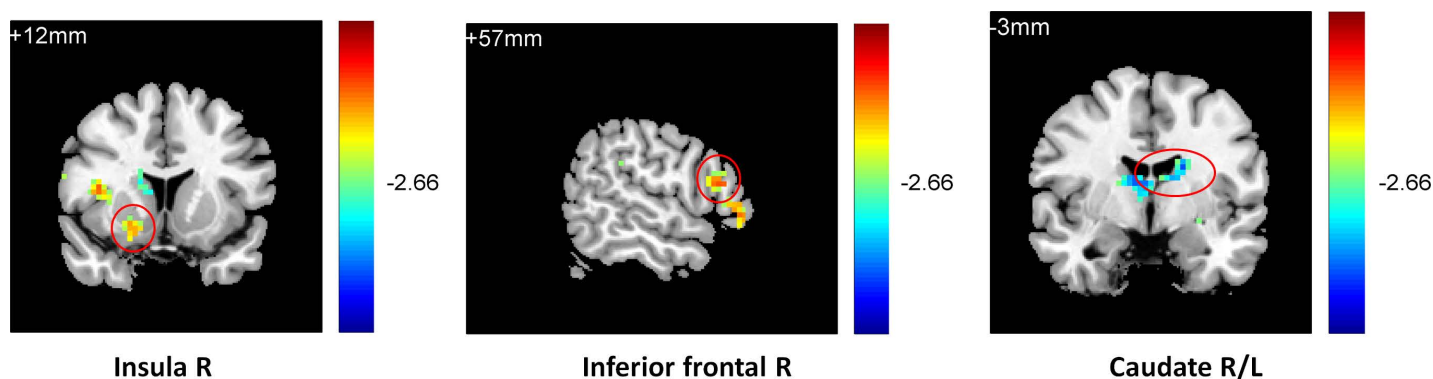

**Fig 6. Higher inferior frontal and insula connectivity and lower caudate connectivity in the RMD group compared with the MDD group.**

<https://doi.org/10.1371/journal.pone.0332816.g006>

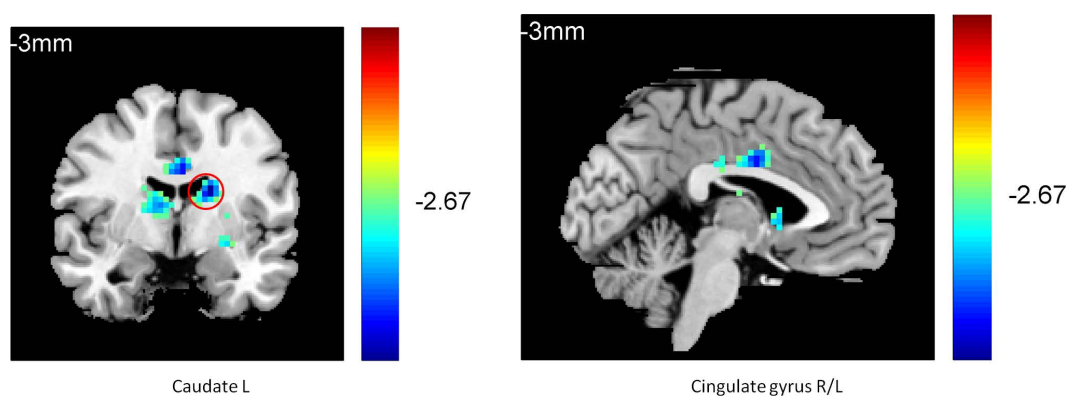

**Fig 7. Lower caudate and cingulate connectivity in the RMD group compared with the NC group.**

<https://doi.org/10.1371/journal.pone.0332816.g007>

Surprisingly, insula and inferior frontal mechanisms shared by depressive episode and anhedonia, while putamen discriminated depressive episode and anhedonia.

Our result found that three groups differed in anhedonia scores, with highest anhedonia in the MDD group and lowest anhedonia in the NC group. This finding supports that anhedonia is a core symptom of clinical depression [13], which is significantly different in different depressive status. This study reports and compares anhedonia symptoms of current and remitted depression in one single study, which enriches the understanding about the anhedonia during the process of depression. Potentially, the differences in resting-state RN mechanism between groups may indicate the neural mechanisms for anhedonia with different levels.

The current study confirmed a correlation between RN connectivity and depressive anhedonia. The findings suggested that in the total sample, there was a consistent and negative correlation between anhedonia and striatum connectivity with the insula, inferior frontal cortex, AC, thalamus, and putamen. In the RMD group, there was a different correlation model, i.e., a consistent positive correlation between the severity and frequency of anhedonia and the AC, thalamus, a different negative correlation between the severity of anhedonia and striatum connectivity with the caudate. No significant correlation between anhedonia and striatum connectivity was indicated in the NC and MDD groups, which suggested that too low or too high prevalence of anhedonia in the subgroup muted the correlation between symptoms of anhedonia and striatum connectivity, while a proportionate occurrence of anhedonia in the RMD group could reflect a correlation trend. Although anhedonia score goes  $MDD > RMD > NC$ , however, as discussed previously, anhedonia is a core symptom of depressive episode, anhedonia itself can not represent a depressive episode [20]. Thus, the correlation between anhedonia score and RN activation can not be equal to the correlation between depressive scores and RN activation: anhedonia and depressive episode share similar but subtly-different RN mechanism (**Hypothesis 1**). Interestingly, in all group analysis, right putamen was negatively correlated with severity of anhedonia, while left putamen was negatively correlated with frequency of anhedonia, which was consistent with previous reporting [46]. Moreover, in RMD group analysis, right caudate negatively correlated with severity of anhedonia and positively correlated with frequency of anhedonia, while this cortex did not report a correlation in all group analysis, which verified recent animal experiment in a sense [47]. The reason might be that the reward network mechanisms underlying the severity and frequency of anhedonia are different (hemisphere preference in putamen activation, and direction preference in caudate activation in RMD), since that high frequency (almost every day) may be mild in severity (I don't like things as usual), which needs further evidence. The current study confirmed that RMD patients possess a different RN pattern of anhedonia compared with MDD (**Hypothesis 2**), first report in its kind, as far as we know, which enriches the understanding about the neural mechanism underlying anhedonia during the process of depression. Together, the correlation results suggested unique roles of putamen, insula and inferior frontal cortex in anhedonia, a role of caudate in the remission of depression, and a role of AC and thalamus as trait-like characteristic of anhedonia and depression remission, which were shared by the whole sample and RMD group.

Analysis of the functional connectivity indicated that the MDD group showed weaker connectivity between the striatum seed and the inferior frontal cortex and insula. In contrast, the RMD group possessed stronger connectivity between the inferior frontal cortex and insula and the striatum seed. The findings suggested that weaker connectivity between the striatum seed and the inferior frontal cortex and insula contributes to episodes of depression, while the remission of depression compensates for the decreased functional connectivity. The results indicate a potential insula and inferior frontal mechanism in depressive episode, i.e., decreased connectivity between the striatum and insula and inferior frontal cortex might result in an episode of depression [48–50], which broadens our understanding of the RN mechanism in depressive episode.

One improvement of the current study over the previous literature was that this study observed the RN mechanism in remitted depression. The functional connectivity results confirmed that the RMD group exhibited weaker connectivity between the striatum seed and caudate compared with patients with current depression and the normal controls (**Hypothesis 2**). The results suggest that the remitted patients might maintain an emotional balance through decreased

connectivity between the striatum seed and caudate, which reveals a potential caudate mechanism in the recovery of depression, i.e., individuals with remitted depression might reach an emotional balance via decreased connectivity between the ventral striatum and caudate [51].

Importantly, both patients with current and remitted depression possessed weaker connectivity between the striatum seed and AC, while MDD group indicated higher ALFF amplitude in AC compared with RMD group. The results indicated that the weaker connectivity between the striatum seed and the AC remained unchanging before and after the remission of depression, which might be a trait-like biomarker of depression constantly correlated with the occurrence or recurrence of depression. Combined with task-state fMRI in our previous reporting [52], i.e., MDD group showed higher activation in AC during a cue-target task compared with RMD group, the results suggest a potential antidepressant target in clinic, i.e., the AC might be a candidate cortex in the prevention and treatment of depression.

T1 scan data was further analyzed and indicated that MDD patients had bigger volume in thalamus compared with the RMD group. Combining the T1 result with correlation findings and the functional connectivity results, our data suggested that the insula and inferior frontal cortex characterized by anhedonia and depressive episode, the caudate was more involved in the remission of depression, the putamen was involved only in the depressive anhedonia, and the AC and thalamus represented a trait-like mechanism in anhedonia, depressive episode and remission. The results confirm that anhedonia is a core symptom of depressive episode, which might be a core pathological mechanism underlying episode of depression [16,53], i.e., there are shared AC, thalamus, insula, and inferior frontal mechanisms between depressive episode and anhedonia, however, anhedonia has unique putamen mechanism (**Hypothesis 1**).

Limitations: First, the sample size was small in this study, which affected the explanatory power of our findings. Second, the brain volume or intelligence level of subjects were not evaluated, which is common in the research using fMRI [54]. Third, the anhedonia score was evaluated by two items of scales (The first item of PHQ and the fourth item of BDI-II) instead of more detailed instrument, and the neural activation of anhedonia was observed only by resting-state data which could be well observed in resting-state neural image [12, 15]. Finally, patients with current episode were all medicated, which has been confirmed that there was no obvious effect of medicine on cerebral connectivity [55,56].

Notably, this study included patients with current and remitted depression and confirmed that MDD and RMD patients possess different RN pattern, as well as depressive episode and anhedonia. The findings help to suggest candidate cortex in the treatment of depression. Specifically, caudate involves more in remitted depression, which might be an indicator of remitted stage, and be a potential target in future antidepressant treatment such as deep brain stimulation or medication. Putamen indicates only anhedonia but not depressive episode, which might be used to discriminate anhedonia and depressive episode. Insula and inferior frontal involve in both depressive episode and anhedonia, which might be cortex markers of both situations. Notably, AC and thalamus are trait-like markers of both current and remitted depression, which might involve in different stages of depressive progress, and reflected trait-like neural changes in depression. Future neural experiments including both MDD and RMD are warranted to confirm these findings.

## Conclusions

The current study is among the first to confirm that RMD patients possess different RN pattern of anhedonia compared with MDD. The findings that the AC, caudate, insula, and inferior frontal cortexes function differently in anhedonia, depressive episodes, and depression remission, provide important suggestions for the therapy of clinical depression, i.e., the caudate is more involved in the recovery from depression, the putamen is involved more in anhedonia, the insula and inferior frontal cortex represent depressive episodes and anhedonia, and the AC and thalamus represent anhedonia, depressive episodes, and depression remission. Hence, the findings offer reliable evidence for the caudate mechanism in remitted depression, the insula and inferior frontal mechanisms in depressive episodes/anhedonia, and the trait-like AC and thalamus mechanisms in both anhedonia/depressive episodes and remission, which suggest candidate biomarkers for the treatment of clinical depression.

## Supporting information

**S1 Fig. Flow chart of participant recruitment.**

(TIF)

**S2 Fig. The reward network (RN, ventral striatum seed, 21, 9, 0).**

(TIF)

**S3 Fig. Scatterplots of correlation between functional connectivity and depressive anhedonia.**

(TIF)

**S4 Fig. Group difference on function connectivity with the whole brain (striatum seed).**

(TIF)

**S5 Fig. Bigger thalamus volume in MDD compared with the RMD group.**

(TIFF)

**S1 Data. RN group data.**

(XLSX)

## Author contributions

**Data curation:** Xiaoxiao Sun, Zhaohua Chen.

**Formal analysis:** Xiaoxiao Sun, Chenxuan Jin, Chun Cui.

**Funding acquisition:** Qin Dai.

**Investigation:** Xiaoxiao Sun.

**Writing – original draft:** Chenxuan Jin.

**Writing – review & editing:** Qin Dai.

## References

1. Smith K. Mental health: A world of depression. *Nature*. 2014;515(7526):180–1.
2. Rizo C, Deshpande A, Ing A, Seeman N. A rapid, Web-based method for obtaining patient views on effects and side-effects of antidepressants. *J Affect Disord*. 2011;130(1–2):290–3. <https://doi.org/10.1016/j.jad.2010.07.027> PMID: 20705344
3. Hardevald F, Spijker J, De Graaf R, Nolen WA, Beekman ATF. Prevalence and predictors of recurrence of major depressive disorder in the adult population. *Acta Psychiatrica Scandinavica*. 2010;122(3):184–91.
4. Stickel S, Wagels L, Wudarczyk O, Jaffee S, Habel U, Schneider F, et al. Neural correlates of depression in women across the reproductive lifespan - An fMRI review. *J Affect Disord*. 2019;246:556–70. <https://doi.org/10.1016/j.jad.2018.12.133> PMID: 30605874
5. Gong L, He C, Zhang H, Zhang H, Zhang Z, Xie C. Disrupted reward and cognitive control networks contribute to anhedonia in depression. *J Psychiatr Res*. 2018;103:61–8. <https://doi.org/10.1016/j.jpsychires.2018.05.010> PMID: 29783076
6. Hassamal S. Chronic stress, neuroinflammation, and depression: an overview of pathophysiological mechanisms and emerging anti-inflammatories. *Front Psychiatry*. 2023;14:1130989. <https://doi.org/10.3389/fpsy.2023.1130989> PMID: 37252156
7. Haber SN, Knutson B. The reward circuit: linking primate anatomy and human imaging. *Neuropsychopharmacology*. 2010;35(1):4–26. <https://doi.org/10.1038/npp.2009.129> PMID: 19812543
8. Bondy E, Baranger DAA, Balbona J, Sputo K, Paul SE, Oltmanns TF, et al. Neuroticism and reward-related ventral striatum activity: Probing vulnerability to stress-related depression. *J Abnorm Psychol*. 2021;130(3):223–35. <https://doi.org/10.1037/abn0000618> PMID: 33539118
9. Bore MC, Liu X, Huang X, Kendrick KM, Zhou B, Zhang J, et al. Common and separable neural alterations in adult and adolescent depression - Evidence from neuroimaging meta-analyses. *Neurosci Biobehav Rev*. 2024;164:105835. <https://doi.org/10.1016/j.neubiorev.2024.105835> PMID: 39084585
10. Hwang JW, Xin SC, Ou YM, Zhang WY, Liang YL, Chen J, et al. Enhanced default mode network connectivity with ventral striatum in subthreshold depression individuals. *J Psychiatr Res*. 2016;76:111–20. <https://doi.org/10.1016/j.jpsychires.2016.02.005> PMID: 26922247



11. Takamura M, Okamoto Y, Okada G, Toki S, Yamamoto T, Ichikawa N, et al. Patients with major depressive disorder exhibit reduced reward size coding in the striatum. *Prog Neuropsychopharmacol Biol Psychiatry*. 2017;79(Pt B):317–23. <https://doi.org/10.1016/j.pnpbp.2017.07.006> PMID: [28705766](#)
12. Downar J, Geraci J, Salomons TV, Dunlop K, Wheeler S, McAndrews MP, et al. Anhedonia and reward-circuit connectivity distinguish nonresponders from responders to dorsomedial prefrontal repetitive transcranial magnetic stimulation in major depression. *Biol Psychiatry*. 2014;76(3):176–85. <https://doi.org/10.1016/j.biopsych.2013.10.026> PMID: [24388670](#)
13. Hamilton JB, Worthy VC, Moore AD, Best NC, Stewart JM, Song M-K. Messages of Hope: Helping Family Members to Overcome Fears and Fatalistic Attitudes Toward Cancer. *J Cancer Educ*. 2017;32(1):190–7. <https://doi.org/10.1007/s13187-015-0895-z> PMID: [26314571](#)
14. Cipriano-Crespo C, Conde-Caballero D, Rivero Jiménez B, Mariano-Juárez L. Eating experiences and quality of life in patients with larynx cancer in Spain. A qualitative study. *Int J Qual Stud Health Well-being*. 2021;16(1):1967262. <https://doi.org/10.1080/17482631.2021.1967262> PMID: [34668841](#)
15. Bolton JL, Molet J, Regev L, Chen Y, Rismanchi N, Haddad E, et al. Anhedonia Following Early-Life Adversity Involves Aberrant Interaction of Reward and Anxiety Circuits and Is Reversed by Partial Silencing of Amygdala Corticotropin-Releasing Hormone Gene. *Biol Psychiatry*. 2018;83(2):137–47. <https://doi.org/10.1016/j.biopsych.2017.08.023> PMID: [29033027](#)
16. Quevedo K, Ng R, Scott H, Kodavaganti S, Smyda G, Diwadkar V, et al. Ventral Striatum Functional Connectivity during Rewards and Losses and Symptomatology in Depressed Patients. *Biol Psychol*. 2017;123:62–73. <https://doi.org/10.1016/j.biopsycho.2016.11.004> PMID: [27876651](#)
17. Bekhbat M, Li Z, Mehta ND, Treadway MT, Lucido MJ, Woolwine BJ, et al. Functional connectivity in reward circuitry and symptoms of anhedonia as therapeutic targets in depression with high inflammation: evidence from a dopamine challenge study. *Mol Psychiatry*. 2022;27(10):4113–21. <https://doi.org/10.1038/s41380-022-01715-3> PMID: [35927580](#)
18. Höflich A, Michenthaler P, Kasper S, Lanzenberger R. Circuit mechanisms of reward, anhedonia, and depression. *Int J Neuropsychopharmacol*. 2019;22(2):105–18.
19. Bains N, Abdijadid S. Major depressive disorder. StatPearls. Treasure Island (FL): StatPearls Publishing. 2023.
20. Chen X, Liu S, Goraya MU, Maarouf M, Huang S, Chen J-L. Host Immune Response to Influenza A Virus Infection. *Front Immunol*. 2018;9:320. <https://doi.org/10.3389/fimmu.2018.00320> PMID: [29556226](#)
21. Ashaie SA, Funkhouser CJ, Jabbarinejad R, Cherney LR, Shankman SA. Longitudinal Trajectories of Post-Stroke Depression Symptom Subgroups. *Neurorehabil Neural Repair*. 2023;37(1):46–52. <https://doi.org/10.1177/15459683221143464> PMID: [36524237](#)
22. Sudol K, Conway C, Szymkowicz SM, Elson D, Kang H, Taylor WD. Cognitive, Disability, and Treatment Outcome Implications of Symptom-Based Phenotyping in Late-Life Depression. *Am J Geriatr Psychiatry*. 2023;31(11):919–31. <https://doi.org/10.1016/j.jagp.2023.06.003> PMID: [37385899](#)
23. Kessler RC. Epidemiology of depression. In: Hammen IG, Hammen C. *Handbook of depression*. New York: Guilford Press. 2002.
24. Hollon SD. What we got wrong about depression and its treatment. *Behav Res Ther*. 2024;180:104599. <https://doi.org/10.1016/j.brat.2024.104599> PMID: [38925002](#)
25. Ironside M, Duda JM, Moser AD, Holsen LM, Zuo CS, Du F, et al. Association of Lower Rostral Anterior Cingulate GABA+ and Dysregulated Cortisol Stress Response With Altered Functional Connectivity in Young Adults With Lifetime Depression: A Multimodal Imaging Investigation of Trait and State Effects. *Am J Psychiatry*. 2024;181(7):639–50. <https://doi.org/10.1176/appi.ajp.20230382> PMID: [38685857](#)
26. Shukla R, Newton DF, Sumitomo A, Zare H, Mccullumsmith R, Lewis DA, et al. Molecular characterization of depression trait and state. *Mol Psychiatry*. 2022;27(2):1083–94. <https://doi.org/10.1038/s41380-021-01347-z> PMID: [34686766](#)
27. Ming Q, Zhong X, Zhang X, Pu W, Dong D, Jiang Y. State-Independent and Dependent Neural Responses to Psychosocial Stress in Current and Remitted Depression. *The American Journal of Psychiatry*. 2017;174(10):971–9.
28. Dichter GS, Kozink RV, McClernon FJ, Smoski MJ. Remitted major depression is characterized by reward network hyperactivation during reward anticipation and hypoactivation during reward outcomes. *J Affect Disord*. 2012;136(3):1126–34. <https://doi.org/10.1016/j.jad.2011.09.048> PMID: [22036801](#)
29. Hammar Å, Neto E, Clemo L, Hjetland GJ, Hugdahl K, Elliott R. Striatal hypoactivation and cognitive slowing in patients with partially remitted and remitted major depression. *Psych J*. 2016;5(3):191–205. <https://doi.org/10.1002/pchj.134> PMID: [27293083](#)
30. Szczypiński JJ, Gola M. Dopamine dysregulation hypothesis: the common basis for motivational anhedonia in major depressive disorder and schizophrenia?. *Rev Neurosci*. 2018;29(7):727–44. <https://doi.org/10.1515/revneuro-2017-0091> PMID: [29573379](#)
31. Lozano-Goupil J, Shankman SA, Walther S, Wuethrich F, Maher RE, Grzelak LN, et al. Automatic quantification of hand gestures in current and remitted Major Depressive Disorder during oral expression. *J Affect Disord*. 2025;389:119684.
32. Beck AT, Steer RA, Brown GK. *Manual for the Beck Depression Inventory*. San Antonio, TX: The Psychological Association. 1996.
33. Button KS, Kounali D, Thomas L, Wiles NJ, Peters TJ, Welton NJ, et al. Minimal clinically important difference on the Beck Depression Inventory—II according to the patient's perspective. *Psychol Med*. 2015;45(15):3269–79. <https://doi.org/10.1017/S0033291715001270> PMID: [26165748](#)
34. Kroenke K, Spitzer RL, Williams JB. The PHQ-9: validity of a brief depression severity measure. *J Gen Intern Med*. 2001;16(9):606–13. <https://doi.org/10.1046/j.1525-1497.2001.016009606.x> PMID: [11556941](#)
35. Liu M, Chang Y, Wang D, Fang J, Carson S, Li B, et al. Validation of the patient health questionnaire (PHQ)-9 and PHQ-2 in patients with COPD in China. *BMC Psychiatry*. 2025;25(1):637. <https://doi.org/10.1186/s12888-025-07052-3> PMID: [40598038](#)

36. A P A. Diagnostic and Statistical Manual of Mental Disorders (Fifth ed.). Arlington, VA: American Psychiatric Publishing. 2013.
37. Hamilton M. A rating scale for depression. *J Neurol Neurosurg Psychiatry*. 1960;23(1):56–62. <https://doi.org/10.1136/jnnp.23.1.56> PMID: [14399272](#)
38. de Graaf LE, Gerhards SAH, Arntz A, Riper H, Metsemakers JFM, Evers SMAA, et al. One-year follow-up results of unsupported online computerized cognitive behavioural therapy for depression in primary care: A randomized trial. *J Behav Ther Exp Psychiatry*. 2011;42(1):89–95. <https://doi.org/10.1016/j.jbtep.2010.07.003> PMID: [20723885](#)
39. Dai Q, Feng Z. Deficient interference inhibition for negative stimuli in depression: an event-related potential study. *Clin Neurophysiol*. 2011;122(1):52–61. <https://doi.org/10.1016/j.clinph.2010.05.025> PMID: [20605107](#)
40. Liu P, Shu L. Beck Depression Inventory, BDI; Beck Anxiety Inventory, BAI; Hamilton Depression Rating Scale, HDRS (Chinese). In: Wang XW, Ma H. Assessment inventory handbook of mental health. Bei Jing: Chinese journal of mental health. 1999.
41. Yan C, Zang Y. DPARSF: A MATLAB toolbox for “pipeline” data analysis of resting-state fMRI. *Front Syst Neurosci*. 2010;4:13.
42. Jiang H, Wang A-P, Xu H, Liu Y, Dong Y, Sun Y, et al. Relationship between family support, serum lipid knowledge and quality of life in Chinese breast cancer women with adjuvant endocrine therapy. *Support Care Cancer*. 2022;30(12):10043–50. <https://doi.org/10.1007/s00520-022-07444-1> PMID: [36350381](#)
43. Song X-W, Dong Z-Y, Long X-Y, Li S-F, Zuo X-N, Zhu C-Z, et al. REST: a toolkit for resting-state functional magnetic resonance imaging data processing. *PLoS One*. 2011;6(9):e25031. <https://doi.org/10.1371/journal.pone.0025031> PMID: [21949842](#)
44. Tzourio-Mazoyer N, Landeau B, Papathanassiou D, Crivello F, Etard O, Delcroix N, et al. Automated anatomical labeling of activations in SPM using a macroscopic anatomical parcellation of the MNI MRI single-subject brain. *Neuroimage*. 2002;15(1):273–89. <https://doi.org/10.1006/nimg.2001.0978> PMID: [11771995](#)
45. Walker FR, Pflingst K, Carnevali L, Sgoifo A, Nalivaiko E. In the search for integrative biomarker of resilience to psychological stress. *Neurosci Biobehav Rev*. 2017;74(Pt B):310–20. <https://doi.org/10.1016/j.neubiorev.2016.05.003> PMID: [27179452](#)
46. Du H, Xia J, Fan J, Gao F, Wang X, Han Y, et al. Spontaneous neural activity in the right fusiform gyrus and putamen is associated with consummatory anhedonia in obsessive compulsive disorder. *Brain Imaging Behav*. 2022;16(4):1708–20.
47. Moraga-Amaro R, Vazquez-Matias DA, Nazario LR, Dierckx RAJO, Stehberg J, Doorduyn J, et al. Increased dopamine D2/D3 receptor and serotonin transporter availability in male rats after spontaneous remission from repeated social defeat-induced depression; a PET study in rats. *Neurobiol Dis*. 2024;202:106727. <https://doi.org/10.1016/j.nbd.2024.106727> PMID: [39515530](#)
48. Yang Y, Liu S, Jiang X, Yu H, Ding S, Lu Y, et al. Common and Specific Functional Activity Features in Schizophrenia, Major Depressive Disorder, and Bipolar Disorder. *Front Psychiatry*. 2019;10:52. <https://doi.org/10.3389/fpsy.2019.00052> PMID: [30837901](#)
49. Yu H-L, Liu W-B, Wang T, Huang P-Y, Jie L-Y, Sun J-Z, et al. Difference in resting-state fractional amplitude of low-frequency fluctuation between bipolar depression and unipolar depression patients. *Eur Rev Med Pharmacol Sci*. 2017;21(7):1541–50. PMID: [28429352](#)
50. Wang L, Li F, Mitchell PB, Wang C-Y, Si T-M. Striatal Resting-State Connectivity Abnormalities Associated With Different Clinical Stages of Major Depressive Disorder. *J Clin Psychiatry*. 2020;81(2):19m12790. <https://doi.org/10.4088/JCP.19m12790> PMID: [32078260](#)
51. Cheng Y, Xu J, Arnone D, Nie B, Yu H, Jiang H, et al. Resting-state brain alteration after a single dose of SSRI administration predicts 8-week remission of patients with major depressive disorder. *Psychol Med*. 2017;47(3):438–50. <https://doi.org/10.1017/S0033291716002440> PMID: [27697079](#)
52. Burns DS, Perkins SM, Tong Y, Hilliard RE, Cripe LD. Music therapy is associated with family perception of more spiritual support and decreased breathing problems in cancer patients receiving hospice care. *J Pain Symptom Manage*. 2015;50(2):225–31.
53. Gao K, Sweet J, Su M, Calabrese JR. Depression severity and quality of life of qualified and unqualified patients with a mood disorder for a research study targeting anhedonia in a clinical sample. *Asian Journal of Psychiatry*. 2017;27:40–7.
54. Liston C, Chen AC, Zebley BD, Drysdale AT, Gordon R, Leuchter B, et al. Default mode network mechanisms of transcranial magnetic stimulation in depression. *Biological Psychiatry*. 2014;76(7):517–26.
55. Baert S, De Raedt R, Schacht R, Koster EHW. Attentional bias training in depression: therapeutic effects depend on depression severity. *J Behav Ther Exp Psychiatry*. 2010;41(3):265–74. <https://doi.org/10.1016/j.jbtep.2010.02.004> PMID: [20227062](#)
56. Hernández-Ribas R, Deus J, Pujol J, Segalàs C, Vallejo J, Menchón JM. Identifying brain imaging correlates of clinical response to repetitive transcranial magnetic stimulation (rTMS) in major depression. *Brain Stimulation*. 2013;6(1):54–61.
